# Supplementary material for: Cisplatin, Fluorouracil, and Docetaxel in Unresectable Head and Neck Cancer
Source: Atypon-hosted journal article supplement (doi:10.1056/nejmoa071028), 2007-10-24
Supplement: nejm_vermorken_1695sa1.pdf [file nejm_vermorken_1695sa1.pdf]

## Supplementary Appendix

This appendix has been provided by the authors to give readers additional information about their work.

Supplement to: Vermorken JB, Remenar E, van Herpen C, et al. Cisplatin, fluorouracil, and docetaxel in unresectable head and neck cancer. *N Engl J Med* 2007;357:1695-704.

## Supplementary Appendix

Supplementary Table 1 : Treatment

| <b>Variable</b>                                                                | <b>PF</b> | <b>TPF</b> |
|--------------------------------------------------------------------------------|-----------|------------|
| No. patients randomized                                                        | 181       | 177        |
| No. patients receiving chemotherapy                                            | 179       | 173        |
| No. patients completing chemotherapy <sup>a</sup>                              | 119       | 134        |
| Median no. chemotherapy cycles                                                 | 4         | 4          |
| Patients with dose reductions (%)                                              | 16        | 10         |
| Patients with $\geq 1$ cycle delay (%)                                         | 59        | 27         |
| Patients with cycle delayed >7 days (%)                                        | 22        | 9          |
| Median interval between chemotherapy and radiotherapy (wks)                    | 5.3       | 5.7        |
| Median interval between first day of chemotherapy to first day of radiotherapy | 17.4      | 17.7       |
| No. patients completing radiotherapy <sup>a, b</sup>                           | 120       | 129        |
| Conventional only                                                              | 91        | 100        |
| Hyperfractionated only                                                         | 12        | 12         |
| Accelerated only                                                               | 8         | 8          |
| Conventional and hyperfractionated                                             | 0         | 2          |
| Conventional and accelerated                                                   | 3         | 4          |
| Hyperfractionated and accelerated                                              | 4         | 3          |
| Missing                                                                        | 2         | 0          |
| Median dose of radiotherapy (Gy)                                               | 70        | 70         |
| Overall duration of study treatment (wks)                                      | 20        | 21         |

<sup>a</sup>Protocol defined

<sup>b</sup>Patients with missing individual type of radiotherapy are counted as not receiving this type of radiotherapy (i.e., conventional only may include missing hyperfractionated and/or missing accelerated).

## Acknowledgments

Supported by grants (5U10CA11488-29 through 5U10CA11488-37) from the National Cancer Institute and was sponsored by Sanofi-Aventis which also provided the study drug. The contents of this article are solely the responsibility of the authors and do not necessarily represent the views of the National Cancer Institute.

We are indebted to the patients and their families for agreeing to participate in this trial, to the nurses and data managers for their collaboration, and to the EORTC data center.

The following institutions and investigators participated in the trial:

Institut Jules Bordet, Brussels, Belgium, Dr. Ahmad Awada  
Algemeen Ziekenhuis Middelheim, Antwerpen, Belgium, Dr. D. Van Den Weyngaert  
Universitair Ziekenhuis Antwerpen, Edegem, Belgium, Pr. Jan Baptist Vermorken  
Hopital Universitaire Erasme, Brussels, Belgium, Pr. Thierry Velu  
Centre Hospitalier Regional De La Citadelle, Liège, Belgium, Dr. Thierry Lecomte  
Caritasklinik St. Theresa, Saarbrücken, Germany, Pr. Joachim Preiss  
Centre Leon Berard, Lyon, France, Dr. J.P. Droz  
Centre Oscar Lambret, Lille, France, Dr. Marian Degardin  
Centre Rene Gauducheau, Nantes, France, Dr. Frederic Rolland  
Chu De Dijon, Dijon, France, dr : Cosmidis  
Chu De Nimes - Hopital Caremeau, Nimes, France, Dr. Charles Debrigode  
Radbout University Nijmegen Medical Centre, Nijmegen, The Netherlands, Dr. Peter Mulders  
Chr De Besancon - Hopital Jean Minjot, Besançon, France, Dr. Patrick Bontemps  
Crlc Val D'Aurelle, Montpellier, France, Dr. Didier Cupissol  
Ospedale San Giovanni, Bellinzona, Switzerland, Dr. Jacques Bernier  
C.H.R.U. De Limoges, Limoges, France, Pr. Nicole Tubiana-Mathieu  
Mutterhaus Der Borromäerinnen, Trier, Germany, Dr. Wolfgang Dornoff  
Maria Sklodowska-Curie Cancer Center-Institute Of Oncology, Warsaw, Poland, Dr. Jerzy Piotrowski  
Charing Cross Hospital, London, United Kingdom, Dr. Simon Stewart  
Western Infirmary, Glasgow, United Kingdom, Dr. Robertson  
Azienda Ospedaliera Di Padova, Padova, Italy, Dr. Monfardini  
Centro Di Riferimento Oncologico, Aviano, Italy, Pr. Umberto Tirelli  
Kaiser Franz Josef Spital, Vienna, Austria, Dr. Heinz Roland Kienzer  
National Institute Of Oncology, Budapest, Hungary, Dr. Eva Remenar  
Ospedale Civile, Monselice, Italy, Dr. Lunghi  
Allgemeines Krankenhaus Der Stadt Wien, Vienna, Austria, Dr. Gabriela Kornek  
Karl-Franzens-Universitaet Graz, Graz, Austria, Pr. Helmut Samonigg  
St Elisabeth Cancer Institute, Bratislava, Slovakia, Dr. Stanislav Spanik  
Istanbul University - Institute Of Oncology, Istanbul, Turkey, Pr. Haluk Onat  
Institute Of Oncology & Radiology, Belgrade, Serbia and Mont, Dr. Svetislav Jelic  
University Hospital Motol, Prague, Czech Republic, Dr. Slavicek  
University Hospital In Plzen, Plzen, Czech Republic, Dr. Jindrich Finek  
Borsod-Abaúj-Zemplén County Hospital, Miskolc, Hungary, J. Janos Szanto  
Oncology Centre Of Lublin Land, Lublin, Poland, Dr. Bozena Karczmarek-Borowska  
Institut Catala D'Oncologia, Barcelona, Spain, Dr. Jose Germa Lluch  
Hospital General De Jerez, Jerez, Spain, Dr. Juan Virizuela Echaburu  
National Cancer Institute, Bratislava, Slovakia, Dr. Tomas Salek
